# Supplementary material
Source: publisher site journal article supplement (https://www.dovepress.com/article/504886)
Supplement: Supplementary file 1 [file get_supplementary_file.php]

**Supplementary Table 1 Knowledge Dimension Response Distribution**

| Items, n (%) | Very familiar | Heard of | Unclear |
| --- | --- | --- | --- |
| 1. Spinal tumors, also known as intraspinal tumors, encompass primary or secondary tumors that occur within the spinal cord itself or in various adjacent tissues within the spinal canal (such as nerve roots, meninges, etc.). | 54 (11.04) | 309 (63.19) | 126 (25.77) |
| 2. The incidence of spinal cord tumors is not high, and compression of the spinal cord or nerves can cause a series of clinical symptoms, thus surgical treatment is generally recommended. | 75 (15.34) | 306 (62.58) | 108 (22.09) |
| 3. Spinal cord tumors can be classified as primary or secondary. Most primary spinal cord tumors are benign, and surgical resection can achieve good treatment outcomes. | 77 (15.75) | 295 (60.33) | 117 (23.93) |
| 4. The spinal canal can be divided into cervical, thoracic, lumbar, and sacral regions based on location. Intraspinal tumors can occur at any location within these spinal canal segments. | 83 (16.97) | 282 (57.67) | 124 (25.36) |
| 5. The higher the location of intraspinal tumor growth, the more severe the consequences; conversely, lower location tumors have less impact on neurological function and self-care ability. Larger tumors exert greater compression on surrounding structures, resulting in more severe symptoms. | 73 (14.93) | 291 (59.51) | 125 (25.56) |
| 6. Typical symptoms of spinal cord tumors include pain (often intermittent), abnormal or diminished sensation (such as numbness or weakness in the legs when walking), motor disturbances (such as weakness in the upper or lower limbs), and even urinary or bowel incontinence. | 84 (17.18) | 300 (61.35) | 105 (21.47) |
| 7. Preoperative diagnosis and localization of spinal cord tumors are crucial. Combining advanced techniques (such as magnetic resonance imaging, spinal cord angiography, etc.) allows for accurate preoperative localization of spinal cord tumors, evaluation of tumor size, growth direction, blood supply, and anatomical relationships with surrounding structures. | 73 (14.93) | 258 (52.76) | 158 (32.31) |
| 8. Surgical treatment of intraspinal tumors typically requires a midline posterior approach to open the spinal canal, which may alter spinal stability and necessitate postoperative internal fixation. | 60 (12.27) | 258 (52.76) | 171 (34.97) |
| 9. Microsurgical resection of spinal cord tumors under the microscope, combined with adjunctive techniques such as intraoperative neurophysiological monitoring, maximally preserves spinal cord function. | 51 (10.43) | 246 (50.31) | 192 (39.26) |
| 10. For extensive segmental tumors or tumors significantly invading lateral facet joints, combined internal fixation techniques can prevent postoperative spinal instability and deformity. | 41 (8.38) | 224 (45.81) | 224 (45.81) |
| 11. Laminoplasty involves removing the lamina with certain tools during surgery, then after tumor resection, restoring the lamina and fixing it with titanium screws or plates, thus avoiding damage to spinal stability. | 45 (9.20) | 265 (54.19) | 179 (36.61) |
| 12. Laminectomy utilizes the gap between the vertebral bodies to remove the lower edge of the upper vertebral body and the upper edge of the lower vertebral body, creating a small "window" for surgery. Compared to traditional surgery, it preserves the ligamentous structure of the spine, retains the small joint structure between the vertebral bodies, and maximally preserves the integrity of the posterior vertebral structure, ensuring postoperative spinal stability. | 41 (8.38) | 208 (42.54) | 240 (49.08) |
| 13. Hemilaminectomy involves only removing half of the lamina for surgery. Although the resection range is larger than laminoplasty, the exposed visual field is also larger, which is beneficial for tumor resection. By only removing half of the vertebral body, spinal stability can still be guaranteed. | 34 (6.95) | 217 (44.38) | 238 (48.67) |
| 14. Minimally invasive surgery reduces damage while also shrinking the surgical field of view and increasing surgical difficulty, therefore it is not suitable for all patients. | 47 (9.61) | 288 (58.90) | 154 (31.49) |

**Supplementary Table 2 Attitude Dimension Response Distribution**

| Items, n (%) | Strongly agree | Agree | Neutral | Disagree | Strongly disagree |
| --- | --- | --- | --- | --- | --- |
| 1. Although I believe that medical treatment from doctors can help me/family get through difficult times regarding spinal cord tumor diagnosis, I still feel very worried. | 132 (26.99) | 294 (60.12) | 48 (9.82) | 12 (2.45) | 3 (0.61) |
| 2. I believe surgery is necessary because spinal cord tumors may affect my/family's neurological function, and surgery may be a way to improve symptoms. | 169 (34.56) | 285 (58.28) | 27 (5.52) | 7 (1.43) | 1 (0.20) |
| 3. Although I know that the appropriate surgical approach can improve my/family's quality of life, I still worry that surgery may affect spinal stability. | 133 (27.20) | 274 (56.03) | 62 (12.68) | 15 (3.07) | 5 (1.02) |
| 4. Understanding the preoperative qualitative diagnosis and localization diagnosis of spinal cord tumors has given me more confidence in the success of surgery. | 143 (29.24) | 308 (62.99) | 33 (6.75) | 4 (0.82) | 1 (0.20) |
| 5. I am concerned that surgery may have a negative impact on my/family's neurological function, which makes me anxious. | 129 (26.38) | 244 (49.90) | 102 (20.86) | 11 (2.25) | 3 (0.61) |
| 6. I have full trust in my/family's doctors, believe in their recommendations, and am willing to actively cooperate with various examinations and treatments. | 173 (35.38) | 291 (59.51) | 23 (4.70) | 1 (0.20) | 1 (0.20) |

**Supplementary Table 3** **Practice Dimension Response Distribution**

| Items, n (%) | Always | Often | Sometimes | Rarely | Never |
| --- | --- | --- | --- | --- | --- |
| 1. Seek information about spinal cord tumors to better understand the disease and treatment options. | 152 (31.08) | 210 (42.94) | 77 (15.75) | 40 (8.18) | 10 (2.04) |
| 2. Follow the doctor's advice and diligently cooperate with the treatment plan and rehabilitation process. | 239 (48.88) | 204 (41.72) | 38 (7.77) | 7 (1.43) | 1 (0.20) |
| 3. Proactively consult with doctors for diagnosis and treatment advice regarding spinal cord tumors. | 203 (41.51) | 203 (41.51) | 62 (12.68) | 19 (3.89) | 2 (0.41) |
| 4. Seek opinions from other doctors to ensure access to the most comprehensive information. | 154 (31.49) | 199 (40.70) | 89 (18.20) | 38 (7.77) | 9 (1.84) |
| 5. Actively participate in postoperative rehabilitation plans, including physical therapy and rehabilitation training. | 237 (48.47) | 189 (38.65) | 48 (9.82) | 12 (2.45) | 3 (0.61) |
| 6. Seek support and understanding from friends, family, or professionals to maintain hope and optimism. | 183 (37.42) | 222 (45.40) | 65 (13.29) | 17 (3.48) | 2 (0.41) |
| 7. Pay attention to appropriate diet and nutritional intake to promote recovery. | 227 (46.42) | 199 (40.70) | 50 (10.22) | 11 (2.25) | 2 (0.41) |
| 8. Monitor changes in symptoms closely and seek medical assistance when necessary. | 245 (50.10) | 196 (40.08) | 34 (6.95) | 12 (2.45) | 2 (0.41) |
